# Supplementary material
Source: publisher figshare collection journal article supplement (https://geolsoc.figshare.com/ndownloader/files/24782344)
Supplement: Supplementary file 1 [file 24782344]

Samples	Pb(ppm)	Th(ppm)	U(ppm)	Th/U	207Pb/206Pb	1s	207Pb/235U	1s	206Pb/238U	1s	207Pb/206Pb Age (Ma)	1s	207Pb/235U Age (Ma)	1s	206Pb/238U Age (Ma)	1s	Concordance
KY281(r)-27	7.56	26.7	3668.3	0.0073	0.046756	0.000336	0.023196	0.000478	0.003598	0.000072	35.3	16.7	23.3	0.5	23.2	0.5	99%
KY281(r)-05	92.5	975.2	37197.4	0.0262	0.047977	0.000201	0.021342	0.000415	0.003225	0.000060	98.2	11.1	21.4	0.4	20.8	0.4	97%
KY281(r)-31	25.4	181.6	10475.2	0.0173	0.048048	0.000551	0.021745	0.000495	0.003283	0.000074	101.9	13.9	21.8	0.5	21.1	0.5	97%
KY281(r)-12	250	4935.5	66331.3	0.0744	0.048564	0.000288	0.025011	0.002018	0.003728	0.000285	127.9	16.7	25.1	2.0	24.0	1.8	96%
KY281(r)-02	51.2	379.2	17415.5	0.0218	0.048717	0.000380	0.024326	0.000730	0.003621	0.000103	200.1	16.7	24.4	0.7	23.3	0.7	95%
KY281(r)-01	13.63	65.6	5152.7	0.0127	0.048853	0.000586	0.023453	0.000788	0.003482	0.000115	139.0	27.8	23.5	0.8	22.4	0.7	95%
KY281(r)-23	72.8	708.6	27423.1	0.0258	0.049066	0.000413	0.020867	0.000458	0.003082	0.000053	150.1	36.1	21.0	0.5	19.8	0.3	95%
KY281(r)-29	145	2508.9	44297.6	0.0566	0.049219	0.000280	0.019702	0.000422	0.002902	0.000058	166.8	11.1	19.8	0.4	18.7	0.4	94%
KY281(r)-44	59.2	440.7	22167.4	0.0199	0.049437	0.000274	0.021632	0.000377	0.003172	0.000052	168.6	11.1	21.7	0.4	20.4	0.3	94%
KY281(r)-25	23.9	102.5	8062.1	0.0127	0.049681	0.000438	0.023721	0.000290	0.003463	0.000046	189.0	22.2	23.8	0.3	22.3	0.3	94%
KY281(r)-50	46.2	312.7	14523.8	0.0215	0.049626	0.000459	0.023757	0.000626	0.003468	0.000068	176.0	22.2	23.8	0.6	22.3	0.4	94%
KY281(r)-42	60.2	379.9	20936.3	0.0181	0.049642	0.000541	0.023256	0.000816	0.003396	0.000110	189.0	27.8	23.3	0.8	21.9	0.7	94%
KY281(r)-40	24.1	94.3	8046.1	0.0117	0.049969	0.000490	0.024509	0.000431	0.003558	0.000068	194.5	36.1	24.6	0.4	22.9	0.4	93%
KY281(r)-11	112	1209.1	40083.2	0.0302	0.049924	0.000306	0.021164	0.000920	0.003072	0.000126	190.8	11.1	21.3	0.9	19.8	0.8	93%
KY281(r)-04	47.9	301.0	15891.6	0.0189	0.050060	0.000708	0.023093	0.000548	0.003346	0.000063	198.2	33.3	23.2	0.5	21.5	0.4	93%
KY281(r)-47	60.2	428.3	20490.1	0.0209	0.050320	0.000792	0.022658	0.000736	0.003263	0.000084	209.3	33.3	22.8	0.7	21.0	0.5	92%
KY281(r)-14	78.1	651.1	24960.2	0.0261	0.050391	0.000531	0.022933	0.001085	0.003292	0.000124	213.0	22.2	23.0	1.1	21.2	0.8	92%
KY281(r)-21	47.0	267.1	14989.2	0.0178	0.050776	0.000452	0.022710	0.000343	0.003243	0.000043	231.6	8.3	22.8	0.3	20.9	0.3	92%
KY281(r)-41	50.4	254.4	13563.5	0.0188	0.051957	0.001013	0.025220	0.000863	0.003520	0.000105	283.4	-52.8	25.3	0.9	22.7	0.7	90%
KY281(r)-15	24.3	106.5	8863.2	0.0120	0.051792	0.000573	0.019338	0.001609	0.002703	0.000213	276.0	-75.0	19.4	1.6	17.4	1.4	89%
KY281(r)-28	109	617.9	29357.7	0.0210	0.052275	0.000494	0.024168	0.000368	0.003353	0.000047	298.2	8.3	24.2	0.4	21.6	0.3	89%
KY281(r)-26	26.4	68.6	6015.4	0.0114	0.053820	0.000700	0.026763	0.000785	0.003602	0.000073	364.9	27.8	26.8	0.8	23.2	0.5	86%
KY281(r)-13	67.1	248.3	12904.5	0.0192	0.052216	0.013394	0.025199	0.006136	0.003348	0.000330	294.5	588.8	25.3	6.1	21.5	2.1	85%
KY281(r)-30	152	1343.7	29197.3	0.0460	0.057150	0.001487	0.026653	0.000742	0.003385	0.000067	498.2	55.6	26.7	0.7	21.8	0.4	82%
KY281(r)-37	86	319.2	15151.3	0.0211	0.058425	0.001962	0.027951	0.000960	0.003470	0.000042	546.3	72.2	28.0	0.9	22.3	0.3	80%
KY281(r)-48	56.8	277.4	8741.3	0.0317	0.061326	0.000900	0.029226	0.000803	0.003452	0.000054	650.0	33.3	29.3	0.8	22.2	0.3	76%
KY281(r)-09	238	1460.1	28691.6	0.0509	0.062582	0.001994	0.032707	0.002279	0.003763	0.000182	694.5	66.7	32.7	2.2	24.2	1.2	74%
KY281(r)-08	137	485.4	22593.0	0.0215	0.063715	0.002759	0.024444	0.001230	0.002781	0.000061	731.5	88.9	24.5	1.2	17.9	0.4	73%
KY281(r)-10	242	603.9	19190.7	0.0315	0.080791	0.002291	0.040213	0.001607	0.003604	0.000071	1216.7	55.5	40.0	1.6	23.2	0.5	58%
KY281(r)-43	506	536.8	17136.8	0.0313	0.133540	0.013693	0.070693	0.008454	0.003792	0.000085	2146.3	178.7	69.4	8.0	24.4	0.5	35%
KY281(r)-46	1197	180.8	11260.7	0.0161	0.246827	0.057633	0.194360	0.065062	0.004845	0.000541	3164.5	371.3	180.3	55.3	31.2	3.5	17%
KY281(c)-22	74.4	69.3	1598.6	0.0433	0.113415	0.001489	0.475655	0.038880	0.030230	0.002089	1854.6	24.1	395.1	26.8	192.0	13.1	49%
KY281(c)-06	72	105.5	692.9	0.1523	0.056303	0.000385	0.244627	0.021981	0.031467	0.002755	464.9	30.6	222.2	17.9	199.7	17.2	90%
KY281(c)-45	110	141.6	736.9	0.1922	0.065397	0.004261	0.627828	0.064730	0.068595	0.002315	787.0	133.3	494.7	40.4	427.7	14.0	86%
KY281(c)-38	95	135.2	335.7	0.4029	0.058927	0.001151	0.576043	0.008934	0.070953	0.000964	564.9	58.3	461.9	5.8	441.9	5.8	96%
KY281(c)-36	531	906.7	650.0	1.3951	0.057292	0.000278	0.611556	0.009404	0.077402	0.001198	501.9	11.1	484.5	6.0	480.6	7.2	99%
KY281(c)-33	193	209.7	911.9	0.2299	0.061057	0.000792	0.653229	0.024316	0.077445	0.002083	642.6	27.8	510.5	15.0	480.9	12.5	94%
KY281(c)-17	52.8	50.1	486.9	0.1029	0.057631	0.000383	0.618415	0.011640	0.077784	0.001191	516.7	16.7	488.9	7.4	482.9	7.2	99%
KY281(c)-34	929	1015.3	737.8	1.3762	0.065580	0.000332	0.705706	0.044083	0.078041	0.004885	794.4	11.1	542.2	26.3	484.4	29.2	89%
KY281(c)-39	93	98.0	645.2	0.1519	0.066054	0.002905	0.723468	0.059826	0.078486	0.003117	809.3	94.4	552.7	35.3	487.1	18.6	88%
KY281(c)-49	113	168.3	336.4	0.5005	0.057111	0.000304	0.619256	0.011493	0.078629	0.001466	494.5	-2.8	489.4	7.3	487.9	8.8	100%
KY281(c)-18	46.7	70.7	83.1	0.8511	0.057539	0.000497	0.629033	0.009529	0.079277	0.001101	522.3	22.2	495.5	6.0	491.8	6.6	99%
KY281(c)-07	252	359.8	724.9	0.4964	0.057701	0.000282	0.632239	0.016283	0.079467	0.002079	516.7	-2.8	497.5	10.2	492.9	12.4	99%
KY281(c)-19	1024	1655.9	866.8	1.9104	0.057470	0.000317	0.630056	0.009764	0.079495	0.001195	509.3	25.0	496.1	6.2	493.1	7.2	99%
KY281(c)-20	602	863.1	500.1	1.7261	0.057335	0.000340	0.688536	0.006750	0.087077	0.000787	505.6	11.1	531.9	4.2	538.2	4.7	101%
KY281(c)-16	484	424.0	651.1	0.6512	0.069501	0.000322	1.101295	0.012178	0.114906	0.001282	922.2	9.7	754.0	6.1	701.2	7.5	93%
KY281(c)-24	443	352.4	720.4	0.4892	0.071371	0.000547	1.300493	0.020572	0.132117	0.001721	968.5	15.8	845.9	9.2	799.9	9.9	95%
KY281(c)-32	158	77.0	603.0	0.1277	0.076350	0.000375	1.643589	0.092505	0.156065	0.008690	1105.6	11.1	987.1	35.6	934.9	48.5	95%
KY281(c)-35	426	342.8	380.1	0.9017	0.071784	0.000367	1.547468	0.027430	0.156290	0.002536	988.9	11.1	949.5	11.1	936.1	14.2	99%
KY281(c)-03	792	319.9	530.0	0.6036	0.107031	0.000506	4.122461	0.109617	0.279422	0.007939	1750.0	10.6	1658.8	22.0	1588.4	40.1	96%
KY291-02	32.3	359.5	12010.2	0.0299	0.046398	0.000304	0.023209	0.000470	0.003626	0.000073	16.8	30.6	23.3	0.5	23.3	0.5	100%
KY291-14	39.6	613.5	12456.3	0.0493	0.047003	0.000271	0.022519	0.000398	0.003473	0.000060	55.7	-2.8	22.6	0.4	22.3	0.4	99%
KY291-11	55.8	735.4	19685.3	0.0374	0.047314	0.000293	0.022270	0.000443	0.003412	0.000070	64.9	25.0	22.4	0.4	22.0	0.5	98%
KY291-17	52.8	577.7	18273.8	0.0316	0.047413	0.000266	0.023331	0.000401	0.003568	0.000067	77.9	16.7	23.4	0.4	23.0	0.4	98%
KY291-01	106	2074.6	31859.8	0.0651	0.047427	0.000309	0.020583	0.000353	0.003146	0.000053	77.9	16.7	20.7	0.4	20.2	0.3	98%
KY291-16	71.4	1658.9	15066.2	0.1101	0.047685	0.000335	0.021449	0.000388	0.003262	0.000068	83.4	30.6	21.5	0.4	21.0	0.4	97%
KY291-06	109	1778.4	30541.8	0.0582	0.048136	0.000323	0.022028	0.000758	0.003315	0.000103	105.6	30.6	22.1	0.8	21.3	0.7	96%
KY291-15	39.6	527.7	11949.5	0.0442	0.048458	0.000455	0.022402	0.000441	0.003350	0.000049	120.5	8.3	22.5	0.4	21.6	0.3	96%
KY291-12	44.2	587.8	13549.2	0.0434	0.048493	0.000350	0.022569	0.000791	0.003374	0.000115	124.2	16.7	22.7	0.8	21.7	0.7	96%
KY291-18	76.4	1207.7	21772.4	0.0555	0.049147	0.000565	0.021429	0.000279	0.003164	0.000063	153.8	27.8	21.5	0.3	20.4	0.4	95%
KY291-08	65.9	1220.2	13835.1	0.0882	0.052322	0.000782	0.026726	0.001137	0.003695	0.000113	298.2	33.3	26.8	1.1	23.8	0.7	89%
KY291-03	331	16910.2	44586.3	0.3793	0.052313	0.000630	0.016642	0.000691	0.002303	0.000081	298.2	13.9	16.8	0.7	14.8	0.5	88%
KY291-13	93	5314.1	23070.3	0.2303	0.052656	0.002192	0.012459	0.001143	0.001700	0.000096	322.3	94.4	12.6	1.1	10.9	0.6	87%
KY291-07	275	3639.2	43012.1	0.0846	0.054396	0.001935	0.026651	0.001775	0.003529	0.000142	387.1	77.8	26.7	1.8	22.7	0.9	85%
KY291-05	191	633.1	17101.5	0.0370	0.074716	0.002145	0.037110	0.001041	0.003606	0.000072	1061.1	55.5	37.0	1.0	23.2	0.5	63%
KY291-04	249	1240.2	18550.6	0.0669	0.080790	0.003988	0.040541	0.002594	0.003624	0.000094	1216.7	100.0	40.4	2.5	23.3	0.6	58%
KY291-19	319	692.9	16971.7	0.0408	0.108172	0.012521	0.044680	0.006135	0.002959	0.000094	1768.8	211.1	44.4	6.0	19.0	0.6	43%
KY291-10	378	1290.7	16297.2	0.0792	0.116805	0.005847	0.057501	0.003931	0.003550	0.000076	1909.3	92.1	56.8	3.8	22.8	0.5	40%
KY291-20	798	1207.9	17782.0	0.0679	0.169983	0.015059	0.097633	0.010236	0.004130	0.000096	2557.7	148.1	94.6	9.5	26.6	0.6	28%
KY291-09	2540	419.1	9717.6	0.0431	0.404312	0.051038	0.451643	0.121753	0.007252	0.001021	3925.2	189.8	378.4	85.2	46.6	6.5	12%
KY341-18	16.67	75.2	8911.0	0.0084	0.045899	0.000498	0.020824	0.000393	0.003289	0.000061	0.0	0.0	20.9	0.4	21.2	0.4	101%
KY341-25	8.71	19.8	5411.1	0.0037	0.045953	0.000431	0.019265	0.000304	0.003040	0.000045	0.0	0.0	19.4	0.3	19.6	0.3	101%
KY341-16	23.18	106.2	11397.6	0.0093	0.046029	0.000414	0.022935	0.000489	0.003612	0.000078	0.0	0.0	23.0	0.5	23.2	0.5	101%
KY341-09	13.44	60.9	7483.2	0.0081	0.046147	0.000423	0.020600	0.000396	0.003235	0.000063	400.1	61.0	20.7	0.4	20.8	0.4	101%
KY341-04	7.24	16.0	4387.0	0.0036	0.046153	0.000420	0.019390	0.000260	0.003046	0.000043	5.7	22.2	19.5	0.3	19.6	0.3	101%
KY341-23	23.49	113.5	12286.4	0.0092	0.046215	0.000452	0.021055	0.000307	0.003303	0.000041	9.4	74.9	21.2	0.3	21.3	0.3	100%
KY341-29	9.42	25.6	5435.7	0.0047	0.046282	0.000336	0.020194	0.000395	0.003164	0.000060	13.1	16.7	20.3	0.4	20.4	0.4	100%
KY341-17	22.8	156.0	9916.8	0.0157	0.046336	0.000465	0.022410	0.000380	0.003506	0.000058	16.8	41.7	22.5	0.4	22.6	0.4	100%
KY341-30	8.19	41.3	4115.1	0.0100	0.046464	0.000330	0.020771	0.000417	0.003242	0.000064	20.5	25.0	20.9	0.4	20.9	0.4	100%
KY341-28	12.57	51.2	6992.6	0.0073	0.046562	0.000330	0.020042	0.000288	0.003121	0.000044	33.4	16.7	20.1	0.3	20.1	0.3	100%
KY341-14	30.3	308.6	12974.6	0.0238	0.046670	0.000402	0.020714	0.000414	0.003217	0.000067	31.6	8.3	20.8	0.4	20.7	0.4	99%
KY341-13	11.3	210.3	3767.0	0.0558	0.046882	0.000521	0.019236	0.000862	0.002972	0.000124	42.7	27.8	19.3	0.9	19.1	0.8	99%
KY341-08	9.16	50.6	3762.5	0.0135	0.046990	0.000532	0.022487	0.000720	0.003466	0.000098	55.7	27.8	22.6	0.7	22.3	0.6	99%
KY341-20	37.8	233.3	16296.4	0.0143	0.047190	0.000584	0.020995	0.000810	0.003224	0.000117	57.5	33.3	21.1	0.8	20.7	0.8	98%
KY341-05	21.2	106.2	9484.3	0.0112	0.047419	0.000486	0.022172	0.000541	0.003387	0.000064	77.9	27.8	22.3	0.5	21.8	0.4	98%
KY341-15	23.1	152.7	8672.5	0.0176	0.047647	0.000527	0.022907	0.000626	0.003487	0.000102	83.4	41.7	23.0	0.6	22.4	0.7	98%
KY341-11	7.48	29.1	3714.7	0.0078	0.047715	0.000499	0.018499	0.000465	0.002811	0.000076	83.4	36.1	18.6	0.5	18.1	0.5	97%
KY341-21	14.4	183.5	4351.8	0.0422	0.048090	0.000797	0.021457	0.000665	0.003234	0.000086	101.9	25.0	21.6	0.7	20.8	0.6	97%
KY341-26	22.6	300.5	5596.7	0.0537	0.048547	0.000470	0.023997	0.000545	0.003585	0.000081	124.2	125.0	24.1	0.5	23.1	0.5	96%
KY341-10	7.68	23.0	3027.9	0.0076	0.048719	0.000974	0.021281	0.000816	0.003160	0.000079	200.1	50.0	21.4	0.8	20.3	0.5	95%
KY341-07	56.7	1126.1	8438.8	0.1334	0.050008	0.000737	0.024319	0.000854	0.003537	0.000161	194.5	33.3	24.4	0.8	22.8	1.0	93%
KY341-01	10.28	25.5	2852.4	0.0089	0.050798	0.001368	0.025568	0.000876	0.003651	0.000099	231.6	66.7	25.6	0.9	23.5	0.6	92%
KY341-02	57.8	289.2	15983.3	0.0181	0.051188	0.000380	0.024522	0.000249	0.003473	0.000042	250.1	16.7	24.6	0.3	22.4	0.3	91%
KY341-22	30.5	79.7	9142.1	0.0087	0.051173	0.000589	0.023211	0.000545	0.003288	0.000071	255.6	27.8	23.3	0.5	21.2	0.5	91%
KY341-12	8.83	15.3	2564.5	0.0060	0.052081	0.000984	0.023236	0.000349	0.003240	0.000073	300.1	38.9	23.3	0.4	20.8	0.5	89%
KY341-27	65.8	1162.8	14351.9	0.0810	0.052064	0.000576	0.021293	0.000796	0.002961	0.000087	287.1	27.8	21.4	0.8	19.1	0.6	89%
KY341-24	44.5	379.8	9923.6	0.0383	0.052355	0.000845	0.025515	0.000322	0.003538	0.000060	301.9	52.8	25.6	0.3	22.8	0.4	89%
KY341-03	21.8	18.8	2801.6	0.0067	0.071104	0.002386	0.029843	0.001544	0.003033	0.000088	961.1	66.7	29.9	1.5	19.5	0.6	65%
KY341-19	3175	16962.5	63075.8	0.2689	0.089016	0.001318	0.145964	0.006756	0.011893	0.000545	1405.6	28.7	138.3	6.0	76.2	3.5	55%
KY341-06	363	597.0	666.0	0.8964	0.057044	0.000350	0.555455	0.008046	0.070580	0.001108	494.5	16.7	448.6	5.3	439.6	6.7	98%
KY447(r)-01	24.9	259.8	11468.0	0.0227	0.045858	0.000490	0.020497	0.000407	0.003241	0.000061	0.0	0.0	20.6	0.4	20.9	0.4	101%
KY447(r)-13	14.71	153.1	7844.6	0.0195	0.045856	0.000373	0.019301	0.000334	0.003052	0.000056	0.0	0.0	19.4	0.3	19.6	0.4	101%
KY447(r)-06	9.59	43.8	5611.9	0.0078	0.046054	0.000487	0.019172	0.000257	0.003018	0.000031	400.1	-1172.1	19.3	0.3	19.4	0.2	101%
KY447(r)-08	11.39	71.3	6108.3	0.0117	0.046142	0.000431	0.019728	0.000293	0.003100	0.000050	400.1	-1161.0	19.8	0.3	20.0	0.3	101%
KY447(r)-26	16.41	116.5	9010.5	0.0129	0.046621	0.000303	0.019469	0.000328	0.003028	0.000055	31.6	2.8	19.6	0.3	19.5	0.4	100%
KY447(r)-25	34.3	185.5	17487.7	0.0106	0.046807	0.000255	0.021621	0.000354	0.003349	0.000055	39.0	11.1	21.7	0.4	21.6	0.4	99%
KY447(r)-23	12.65	81.5	6564.2	0.0124	0.046807	0.000345	0.020638	0.000289	0.003197	0.000048	39.0	30.6	20.7	0.3	20.6	0.3	99%
KY447(r)-22	31.1	425.9	11799.8	0.0361	0.047152	0.000331	0.020960	0.000347	0.003223	0.000051	57.5	16.7	21.1	0.3	20.7	0.3	98%
KY447(r)-10	25.6	202.2	11527.1	0.0175	0.047646	0.000596	0.020096	0.000608	0.003055	0.000074	83.4	33.3	20.2	0.6	19.7	0.5	97%
KY447(r)-05	21.4	135.3	8234.2	0.0164	0.048426	0.000598	0.020935	0.000539	0.003132	0.000056	120.5	33.3	21.0	0.5	20.2	0.4	96%
KY447(r)-07	74.9	875.7	20460.7	0.0428	0.048572	0.000462	0.023186	0.001542	0.003461	0.000231	127.9	119.4	23.3	1.5	22.3	1.5	96%
KY447(r)-19	21.3	132.2	7709.1	0.0172	0.049361	0.000526	0.021748	0.000379	0.003197	0.000065	164.9	8.3	21.8	0.4	20.6	0.4	94%
KY447(r)-16	21.4	102.7	8447.8	0.0122	0.049496	0.000477	0.020225	0.000350	0.002962	0.000047	172.3	36.1	20.3	0.4	19.1	0.3	94%
KY447(r)-14	39.8	347.7	11919.3	0.0292	0.050901	0.000644	0.022251	0.000616	0.003168	0.000077	235.3	33.3	22.3	0.6	20.4	0.5	91%
KY447(r)-09	39.2	135.7	8845.9	0.0153	0.055281	0.001911	0.023878	0.000564	0.003141	0.000058	433.4	77.8	24.0	0.6	20.2	0.4	84%
KY447(r)-15	45.5	94.6	5833.1	0.0162	0.065430	0.004594	0.030095	0.001727	0.003359	0.000070	787.0	146.7	30.1	1.7	21.6	0.5	72%
KY447(r)-11	101	311.3	13703.2	0.0227	0.066398	0.002270	0.028958	0.000867	0.003167	0.000052	820.4	72.2	29.0	0.9	20.4	0.3	70%
KY447(r)-02	378	620.6	22007.2	0.0282	0.093513	0.007232	0.046623	0.004092	0.003593	0.000066	1498.2	144.4	46.3	4.0	23.1	0.4	50%
KY447(r)-04	85	116.0	5046.4	0.0230	0.094682	0.001199	0.046249	0.001244	0.003542	0.000091	1521.9	26.4	45.9	1.2	22.8	0.6	50%
KY447(r)-21	498	264.5	9099.3	0.0291	0.196264	0.038417	0.114895	0.027780	0.003897	0.000256	2795.4	321.3	110.4	25.3	25.1	1.6	23%
KY447(r)-12	390	193.1	5295.2	0.0365	0.242571	0.010167	0.146024	0.010404	0.004330	0.000130	3136.7	66.7	138.4	9.2	27.9	0.8	20%
KY447(c)-30	332	488.7	1486.4	0.3288	0.057271	0.000291	0.448184	0.010906	0.056743	0.001394	501.9	11.1	376.0	7.7	355.8	8.5	95%
KY447(c)-03	12364	155.3	4734.4	0.0328	0.619472	0.056515	6.556069	2.170775	0.066842	0.021622	4554.6	132.5	2053.5	291.7	417.1	130.7	20%
KY447(c)-20	334	531.2	396.1	1.3410	0.059256	0.000879	0.652061	0.007242	0.079853	0.001129	576.0	33.3	509.7	4.6	495.2	6.8	97%
KY447(c)-24	84	131.7	116.9	1.1261	0.057460	0.000491	0.636000	0.010549	0.080267	0.001347	509.3	22.2	499.8	6.6	497.7	8.1	100%
KY447(c)-18	34.1	33.0	74.0	0.4466	0.062935	0.000586	1.027459	0.018716	0.118368	0.002030	705.6	36.1	717.7	9.5	721.2	11.8	100%
KY447(c)-28	129	113.8	230.7	0.4931	0.066102	0.000354	1.225423	0.019031	0.134408	0.002013	809.3	11.1	812.3	8.8	813.0	11.5	100%
KY447(c)-27	294	269.3	207.3	1.2988	0.067641	0.000349	1.322413	0.023719	0.141755	0.002552	857.4	11.1	855.6	10.5	854.6	14.5	100%
KY447(c)-29	304	189.7	499.2	0.3800	0.076339	0.000385	1.566479	0.026008	0.148794	0.002568	1105.6	7.9	957.0	10.5	894.2	14.5	93%
KY447(c)-17	572	175.5	209.2	0.8390	0.159542	0.000893	8.890410	0.129583	0.404007	0.006018	2450.9	9.3	2326.8	14.1	2187.5	27.9	94%
KY521(r)-27	10.6	162.8	4008.4	0.0406	0.050899	0.001196	0.017634	0.000290	0.002513	0.000039	235.3	55.5	17.7	0.3	16.2	0.3	91%
KY521(r)-04	7.20	69.6	4080.1	0.0171	0.052202	0.000436	0.018718	0.000265	0.002600	0.000032	294.5	22.2	18.8	0.3	16.7	0.2	89%
KY521(r)-21	6.38	32.2	2662.0	0.0121	0.051158	0.002014	0.018781	0.000323	0.002660	0.000043	255.6	94.4	18.9	0.3	17.1	0.3	91%
KY521(c)-28	217	206.8	556.1	0.3720	0.069211	0.001239	0.857621	0.041326	0.090154	0.005068	905.6	33.3	628.8	22.6	556.4	30.0	88%
KY521(c)-07	2347	2613.2	2873.6	0.9094	0.069104	0.000510	1.123367	0.021071	0.117907	0.002305	901.9	13.4	764.6	10.2	718.5	13.3	94%
KY521(c)-18	334	310.8	708.3	0.4388	0.066896	0.002251	1.094193	0.013365	0.118492	0.001476	835.2	69.9	750.5	6.7	721.9	8.6	96%
KY521(c)-20	1722	1811.3	3076.1	0.5888	0.068869	0.002820	1.130968	0.025048	0.118966	0.002798	894.4	86.6	768.2	12.0	724.6	16.2	94%
KY521(c)-08	997	1099.6	1899.6	0.5789	0.067331	0.000360	1.108080	0.019942	0.119326	0.002015	847.8	11.1	757.2	9.7	726.7	11.7	96%
KY521(c)-22	3126	2863.1	7546.9	0.3794	0.075291	0.002598	1.272325	0.015596	0.122411	0.001437	1075.9	68.0	833.4	7.2	744.4	8.3	89%
KY521(c)-16	1357	1323.6	2690.9	0.4919	0.068405	0.001806	1.157550	0.010186	0.122610	0.001058	880.6	53.2	780.8	5.1	745.6	6.2	95%
KY521(c)-25	2119	2256.6	2515.4	0.8971	0.068787	0.001673	1.176312	0.015328	0.123909	0.001523	892.3	50.0	789.6	7.3	753.0	8.8	95%
KY521(c)-23	884	1334.5	1345.8	0.9917	0.069433	0.002157	1.197343	0.014082	0.124925	0.001377	922.2	49.5	799.4	6.7	758.8	8.0	95%
KY521(c)-26	3083	3053.0	5452.7	0.5599	0.072155	0.001653	1.244699	0.026152	0.125214	0.003543	990.7	44.4	821.0	11.9	760.5	20.3	93%
KY521(c)-14	1247	1284.0	1676.6	0.7658	0.068629	0.001336	1.189384	0.020751	0.125586	0.002042	887.0	38.9	795.7	9.8	762.6	11.8	96%
KY521(c)-01	964	1127.3	1525.7	0.7389	0.068009	0.000291	1.183235	0.022734	0.126156	0.002347	877.8	11.1	792.8	10.7	765.9	13.5	97%
KY521(c)-02	1102	1114.6	1602.6	0.6955	0.067668	0.000267	1.186443	0.014094	0.127140	0.001451	857.4	5.6	794.3	6.7	771.5	8.4	97%
KY521(c)-30	1210	1281.2	1712.1	0.7483	0.067598	0.000555	1.189407	0.026814	0.127573	0.002878	857.4	16.7	795.7	12.5	774.0	16.5	97%
KY521(c)-19	497	495.7	772.4	0.6418	0.067907	0.002530	1.196587	0.015989	0.127624	0.001604	864.8	91.7	799.0	7.6	774.3	9.3	97%
KY521(c)-11	173	165.4	262.3	0.6305	0.068537	0.000741	1.209365	0.018138	0.127918	0.001693	884.9	22.2	804.9	8.5	776.0	9.8	96%
KY521(c)-29	998	1038.2	1429.7	0.7262	0.067935	0.000759	1.199235	0.028203	0.127976	0.003022	866.4	25.5	800.2	13.1	776.3	17.3	97%
KY521(c)-24	702	718.9	990.0	0.7262	0.067673	0.001875	1.199683	0.020852	0.128442	0.002204	857.4	57.9	800.4	9.8	779.0	12.7	97%
KY521(c)-05	1360	1403.2	1787.3	0.7851	0.067682	0.000296	1.202375	0.012568	0.128824	0.001346	858.9	5.6	801.7	6.0	781.2	7.8	97%
KY521(c)-06	638	640.6	939.8	0.6816	0.067142	0.000308	1.198264	0.014455	0.129411	0.001486	842.6	25.0	799.8	6.9	784.5	8.6	98%
KY521(c)-17	288	268.1	402.1	0.6666	0.067545	0.002027	1.207316	0.032113	0.129497	0.003437	853.7	61.1	804.0	14.9	785.0	19.7	98%
KY521(c)-15	1007	944.3	1401.5	0.6738	0.068275	0.001570	1.224101	0.023030	0.129943	0.002557	875.9	50.0	811.6	10.6	787.5	14.6	97%
KY521(c)-09	508	503.7	783.4	0.6430	0.067070	0.000403	1.202909	0.021202	0.130060	0.002273	838.9	13.4	801.9	9.9	788.2	13.0	98%
KY521(c)-12	423	411.3	700.2	0.5875	0.067216	0.000840	1.211841	0.017285	0.130691	0.001825	855.6	27.8	806.0	8.1	791.8	10.5	98%
KY521(c)-03	257	260.2	292.4	0.8899	0.066810	0.000327	1.206462	0.018872	0.130952	0.002030	831.5	11.1	803.6	8.8	793.3	11.6	99%
KY521(c)-13	295	280.6	483.8	0.5801	0.067196	0.001069	1.223139	0.027249	0.131955	0.003026	844.1	31.0	811.2	12.6	799.0	17.3	98%
KY521(c)-10	151	143.3	250.2	0.5727	0.066708	0.000482	1.225494	0.017036	0.133211	0.001655	827.8	2.8	812.3	7.9	806.2	9.5	99%
